# Supplementary material
Source: Springer Nature journal article supplement (https://www.springermedizin.de/resource/supplementary/12907_2012_121_MOESM3_ESM.pdf/9524762)

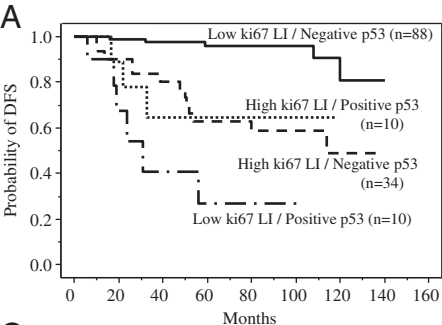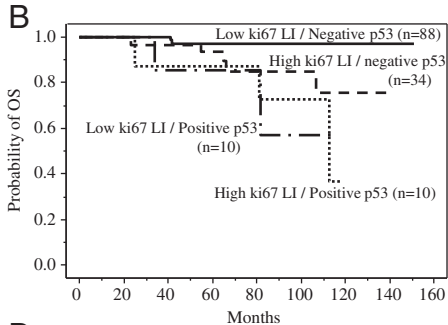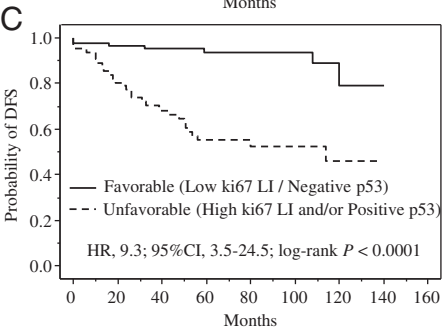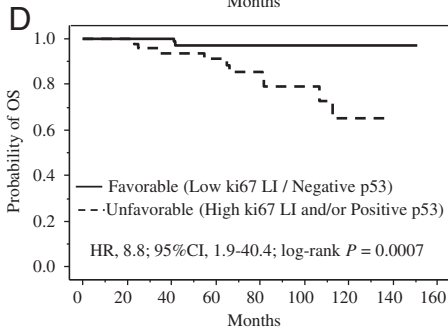

Supplement: MOESM3 [file 9524762]
